# Supplementary material
Source: publisher site journal article supplement (https://www.degruyterbrill.com/publication/journal_key/MIM/downloadAsset/MIM_Instructions%20for%20authors%20MIM.pdf)
Supplement: Supplementary file 1 [file MIM_Instructions%20for%20authors%20MIM.pdf]

|                                                          |     |
|----------------------------------------------------------|-----|
| Scope and general policies of the journal.....           | 1   |
| Manuscript structure and formatting.....                 | 3   |
| Author Statements .....                                  | 7   |
| Language editing and AI usage.....                       | 7   |
| Submission of manuscripts .....                          | 8   |
| Peer review, turnaround times and preprint policies..... | 9   |
| Post-acceptance .....                                    | 10  |
| Rights, licenses and charges .....                       | 101 |
| Support and questions .....                              | 11  |

## Scope and general policies of the journal

### Scope

*Methods in Microscopy (MIM)* aspires to disseminate all sorts of knowledge that help scientists to achieve new research results with their microscope. That includes various types of microscopy, spectroscopy and imaging technologies for various research domains.

In the inaugural years, the journal publishes four issues. The publication language is English. The publication model is Open Access. All articles in the journal are published under a CC BY 4.0 license. All articles accepted for publication will be required to pay an article processing charge (APC). *MiM* is published by Walter de Gruyter on behalf of THOSS Media.

### Topics

*MiM* publishes the latest developments for researchers in physics, material science, medicine, biology or forensics and archeology working with methods such as:

- Optical Microscopy
- Fluorescence Microscopy
- Super-Resolution Microscopy
- (Low- and High Voltage) Electron Microscopy
- Correlative Microscopy
- Scanning Probe Microscopy
- Microscopy combined with Spectroscopy
- Image Analysis/Processing
- Automated Microscopy Techniques
- Software Development
- Hardware Development

### Special issues and special issue section

*MiM* publishes special issues and regular issues with sections focused on important and emerging topics in the field of study. Ideas for special issues/sections are proposed by the journal's editorial board, but the journal will also consider proposals submitted by members of the wider research community. All proposals are assessed for quality and relevance by the Editor-in-Chief and the editorial office.

The journal has established a rigorous process to ensure that any special issues manuscripts follow the same high-quality standards and peer review processes as regular manuscripts. Each special issue/section has dedicated Guest Editors who are responsible for encouraging submissions to the special issue, but not for the coordination of the peer review process. The Editor-in-Chief or the editorial office check the submitted manuscripts and assign them to appropriate peers for review. The Editor-in-Chief has oversight of the entire process within the online submission system and is responsible for the final decision on all manuscripts.

## Article types

| Article type            | Size          | Description/Specification                                                                                                                                                                                                                                                                                                                                                                                                                                                                                                                                                                                                                                                                                                                                                                                                                                                                                                                                                                                                                                                                                                                                                                                                                                                                               |
|-------------------------|---------------|---------------------------------------------------------------------------------------------------------------------------------------------------------------------------------------------------------------------------------------------------------------------------------------------------------------------------------------------------------------------------------------------------------------------------------------------------------------------------------------------------------------------------------------------------------------------------------------------------------------------------------------------------------------------------------------------------------------------------------------------------------------------------------------------------------------------------------------------------------------------------------------------------------------------------------------------------------------------------------------------------------------------------------------------------------------------------------------------------------------------------------------------------------------------------------------------------------------------------------------------------------------------------------------------------------|
| <b>Research article</b> | 4 – 15 pages  | <ul style="list-style-type: none"> <li>• A Research article presents a new methodology, a new instrument, a new technology, or a new imaging workflow. Submissions must offer in-depth technical explanations of the novel approach, accompanied by robust validation data showcasing its performance, reproducibility, broad applicability, and potential for uncovering new insights in the field of application.</li> <li>• Include an abstract of approximately 250 words to provide a succinct summary reflecting the article's results and conclusions.</li> <li>• Follow a standard structure that includes an article title, author names and affiliations, abstract, keywords, introduction, materials and methods, results, discussion, acknowledgements, author statements, and references.</li> </ul>                                                                                                                                                                                                                                                                                                                                                                                                                                                                                       |
| <b>Review article</b>   | 10 – 50 pages | <ul style="list-style-type: none"> <li>• A Review article should provide the reader with a balanced overview of a technology or method and should not be dominated by the work of one single author or institution. The complexity of the writing should serve the wide audience of the journal, i.e., graduates to post-graduates from across disciplines.</li> <li>• Mathematical formulas should be limited. Extensive images and graphs should be included to provide an understanding of the text to the wide audience the journal serves.</li> <li>• Include an abstract of approximately 250 words.</li> <li>• The introduction should be short and focus primarily on recent developments, avoiding too much elaboration on historical developments.</li> <li>• The main body of text is to maintain a standard structure with the use of sections and subsections.</li> <li>• Include an article title, author names and affiliations, abstract, keywords, introduction, materials and methods, discussion, acknowledgements, list of non-standard abbreviations (if applicable), author statements, references, and table and figure legends (if applicable).</li> <li>• Review articles longer than 50 pages can be published by <i>MiM</i>, but please contact the Editor first.</li> </ul> |
| <b>Tutorial</b>         | 4 – 30 pages  | <ul style="list-style-type: none"> <li>• A Tutorial article should provide the reader with a balanced introduction to a technology or method. It should enable the reader to apply the technology in all detail.</li> <li>• Mathematical formulas should be limited. Extensive images and graphs should be included to provide an understanding of the text to the wide audience the journal serves.</li> <li>• Include an abstract of approximately 250 words.</li> <li>• The introduction should be short and focus primarily on the application of this technology, avoiding too much elaboration on historical developments.</li> <li>• The main body of text is to maintain a standard structure with the use of sections and subsections.</li> <li>• Include an article title, author names and affiliations, abstract, keywords, introduction, materials and methods, discussion, acknowledgements, list of non-standard abbreviations (if applicable), author statements, references, and table and figure legends (if applicable).</li> <li>• Supplementary material that supports the didactic approach is very welcome.</li> </ul>                                                                                                                                                           |

|                  |              |                                                                                                                                                                                                                                                                                                                                                                                                                                                                                                                                                                                                                                                                                                                                                                |
|------------------|--------------|----------------------------------------------------------------------------------------------------------------------------------------------------------------------------------------------------------------------------------------------------------------------------------------------------------------------------------------------------------------------------------------------------------------------------------------------------------------------------------------------------------------------------------------------------------------------------------------------------------------------------------------------------------------------------------------------------------------------------------------------------------------|
| <b>Letter</b>    | 3 – 4 pages  | <ul style="list-style-type: none"> <li>• A Letter presents recent advancements in a concise format.</li> <li>• Include a brief abstract of no more than 150 words.</li> <li>• Follow a standard structure that includes a title, author names and affiliations, abstract, keywords, introduction, materials and methods, results, discussion, acknowledgements and list of non-standard abbreviations (if applicable), author statements, references, and table and figure legends (if applicable).</li> </ul>                                                                                                                                                                                                                                                 |
| <b>View</b>      | 2 – 15 pages | <ul style="list-style-type: none"> <li>• A View article presents a new methodology, a new instrument, a new technology, or a new imaging workflow in the perspective of a single author, group, or company. Submissions must offer in-depth technical explanations of the novel approach, accompanied by robust validation data showcasing its performance, reproducibility, broad applicability, and potential for uncovering new insights in the field of application. Views are subject to peer review.</li> <li>• Follow a standard structure that includes an article title, author names and affiliations, abstract, keywords, introduction, materials and methods, results, discussion, acknowledgements, author statements, and references.</li> </ul> |
| <b>Editorial</b> | 1 – 2 pages  | <ul style="list-style-type: none"> <li>• An Editorial should include a title, author names and affiliations.</li> </ul>                                                                                                                                                                                                                                                                                                                                                                                                                                                                                                                                                                                                                                        |

### Article templates

To assist with the preparation of manuscripts, *MiM* provides article templates in both [Word](#) and [LaTeX](#) formats. The use of them is not obligatory, all articles are subject to type setting.

### Inclusive language policy

Inclusive language recognizes diversity, conveys respect for all people, is sensitive to differences and promotes equal opportunities. Content should not make assumptions about readers' beliefs or commitments; should not contain anything that might suggest that one person is superior to another because of age, gender, race, ethnicity, culture, sexual orientation, disability or health condition; and should use inclusive language throughout. Authors should ensure that their writing is free from prejudice, stereotypes, slang, references to the dominant culture and/or cultural assumptions.

We advise the following approach: Aim for gender neutrality by using plural nouns (clinicians, clients, participants) as standard and avoiding “he” or “she”, wherever possible. Instead, please use “they”. We recommend avoiding the use of descriptors that refer to personal characteristics such as age, gender, race, ethnicity, culture, sexual orientation, disability or health status unless they are relevant and valid.

## Manuscript structure and formatting

### Language

All manuscripts must be written in clear and concise English. Please use British or American English consistently. De Gruyter does provide a *light* copyedit of manuscripts, but authors remain responsible for being their own copyeditors. If you have reasons to doubt your proficiency with respect to spelling, grammar, etc. (e.g., because English is not your native language), then you may wish to employ – at your expense – the services of a professional language editor.

### Headings

Your manuscript should be subdivided into sections and, if necessary, subsections. These sections should be labelled with headings in a consistent format and with a clear hierarchy. Limit your subsections to a maximum of four levels. Please ensure that subdivided sections have at least two subheadings on one level. Headings should be numbered and in sentence case. Use lowercase letters after a colon. Headings do not have a full stop.

### Title and short title

Provide a descriptive, concise and comprehensible main title as well as an abbreviated form of the main title (running head) with no more than 40 (small format) characters (including blanks). The short title will be displayed on the top of each page of the final version.

### Abstract

The abstract should be a concise summary of your article. It should be a single paragraph and approximately 250 words (150 words for Letters). As abstracts are published separately by abstracting and indexing services, please spell out abbreviations on first use and do not include footnotes, tables, figures or equations. Please avoid using references.

### Author names

Write at least one given and family name in full. For all other names, initial is sufficient. List authors in the order you want them to appear in the final version. Indicate the corresponding author by using an asterisk \* after the family name. Please note that as per De Gruyter policy, no author list changes are permitted after acceptance of a manuscript. De Gruyter does not allow the use of the Author Randomization Tool of the American Economic Association.

### Affiliations

For the corresponding author supply the following details: e-mail address, department, institution, street, city, postal code and country; for all other authors department, institution, city, postal code and country are mandatory. Please also provide all details concerning the current institutional affiliation in case you changed affiliation during the manuscript preparation and publication process.

Supplying an ORCID is highly recommended (for more information and registration, please visit the ORCID webpage: <https://info.orcid.org/benefits-for-researchers/>)

### Keywords

Keywords are used by abstracting and indexing services as well as search engines to facilitate finding your paper. Please supply three to six specific keywords. These can be single words or short phrases representing the content. Where possible, avoid the repetition of words already used in the article's title.

### Introduction

This is your main opportunity to express to each reader that you clearly know why you have done what you describe in the text. Therefore, please

- provide relevant background information,
- perform a thorough sweep of the literature,
- put your research into a broad context to ensure that each reader (not in daily use with your topic) can understand,
- identify clearly the problem you plan to answer,
- describe and evaluate other existing answers,
- describe the main limitation of your answer,
- describe the benefit of your answer.

### Materials and methods

In this section you must describe how you studied your problem. Give all details necessary to redo your work. If you present calculations, explain the important models of the programs and the modelling of the facilities with these programs, give the starting and boundary conditions. Give figures of the facilities and models and explain them. Stating only a reference to ask the readers to find out themselves it not acceptable. Describe with care to give readers a chance to understand your work. Authors are encouraged to add protocols, videos, or data sets etc. as supplementary material.

### Results

In this section you must describe what you have found. Describe representative results which are the basis for your discussion. Do not simply present any result.

### Discussion

In this section you must discuss your results considering the topic you identified in the introduction. Explain the outcome. Compare to published results. Are your results consistent with published results? If not, explain.

### Conclusion and outlook

Write a clear conclusion. This is not a repetition of the introduction or the results. Please give a scientific justification for your work and also a short outlook.

### References

References must be numbered consecutively in square brackets [] as they are cited. Multiple citations within a single set of brackets should be separated by commas [1, 2]. Where there are more than three sequential citations, they should be given as a range [1-4].

Please note: All references mentioned in the reference list must be mentioned in the text, and vice versa.

All references should be collected at the end of the paper. List all authors when there are six or fewer; when there are seven or more, list the first three, followed by “et al.” When citing internet addresses, it is important to include the access date as well as the URL. For further information and example please download the [reference style sheet \(IEEE\)](#).

### Figures and figure captions

Graphs, line drawings, photographs, schemes and diagrams may be used to illustrate your findings. The publication quality always depends directly on the quality and size of the delivered data. Publication of color figures is provided free of charge in both online and print editions.

Please label the illustrations as “Figure”. The lettering of all figures within the article should be uniform in style (preferably a sans serif typeface such as Helvetica) and of sufficient size (approximately 8pt).

Figures should be numbered consecutively using Arabic numerals (from 1) throughout the text. Please make sure that all figures are explicitly referred to in the text. Do not end the text immediately preceding the suggested positioning of a figure with a colon and avoid expressions such as “in Figure 1 below/above”, as the exact positioning of these elements cannot be determined until after the manuscript has been typeset. Note that figures will usually be placed on the top or the bottom of the page in the final layout.

Provide a concise and self-explanatory caption for each figure. In case of multi-part figures, please include a main caption as well as part figure captions. Uppercase letters A, B, C, etc. should be used to identify multi-part figures.

For an initial submission, authors are strongly advised to upload their entire manuscript, including tables and figures, as a single PDF file. Source files should include DOC/DOCX or TEX (in a ZIP archive) files in which the approximate placement of each figure should be indicated. Preferably, figures should be submitted in separate files; do not embed figures within the text body of the manuscript.

Each figure should be uploaded separately as .jpg, .eps, .png or .tiff file. Images should have a minimum resolution of 300 dpi (color or black-white pixel graphics/half-tone images) in the intended size (600dpi combination of pixel graphic and line drawing, 1200dpi for line drawings). When drawing bar graphs, use patterning/color instead of grey scales (faint shading may be lost upon reproduction). Figures should not display any frames.

### Permissions for the reuse of figures

It is the responsibility of the author(s) to obtain permission to reproduce original or modified material that has been previously published and to ensure that images do not infringe on any copyrights, performing rights, trademark rights, personal rights or any other third-party rights or are otherwise unlawful. Copyright

permissions can be obtained through the Copyright Clearance Center (<https://www.copyright.com/>). If you want to use material published by De Gruyter, please check the instructions on our website: <https://www.degruyter.com/page/rights-permissions>. If you are requesting rights for figures published by other publishers, you need to check the publisher's website for standard terms and conditions.

### Tables and Table Captions

Number tables consecutively using Arabic numerals. Tables should be provided in an editable source format (Word, LaTeX). Please avoid handing in tables as image or Excel files.

Provide a short descriptive title, column heads and (if necessary) footnotes to make each table self-explanatory. In column heads, separate units with a comma and use parentheses or square brackets for additional measures (e.g., %, range, etc.). Use footnotes in alphabetical order (a, b, c, etc.) to give emphasis or further information. Expand abbreviations used in tables in footnotes. If bold type or italics are used to highlight information, please explain their meaning.

Avoid color, shading, vertical lines and other cell borders. Note that most horizontal lines within the table body will be removed during the production process.

Refer to tables in the text as Table 1, etc. Use Table 1, etc. in the table legends. In the text, please avoid expressions such as "in Table 1 below/above", as the exact positioning of these elements cannot be determined until after the manuscript has been typeset. Note that tables will usually be placed on the top or the bottom of the page in the final layout.

### Abbreviations

The use of abbreviations and acronyms is permitted as long as they are expanded in full when used the first time with the abbreviation in parentheses (applies to abstract and main text). Please use them consistently thereafter. Avoid using non-standard abbreviations unless they appear more than three times in the text. We recommend providing a list with an overview of all abbreviations. The list of abbreviations is placed at the end of the main text before the reference list in the typeset manuscript.

### Equations and Symbols

Equations should be well-aligned and not crowded. Use only Latin and Greek alphabets. Avoid complicated superscripts and subscripts by introducing new symbols. Avoid repetition of a complicated expression by representing it with a symbol. For MS Word submissions, create equations using the Microsoft equation editor or a corresponding add-on. Do not submit math equations as images but as editable text. Number displayed equations consecutively with Arabic numerals (if referred to in the text).

- Roman letters used in mathematical expressions as variables must be italicized. Roman letters used as part of multi-letter function names should not be italicized. Subscripts and superscripts must be a smaller font size than the main text.
- Type short mathematical expressions inline.
- Longer expressions must appear as display math, as must expressions using many different levels (e.g., such as fractions).
- Ensure that Equations are typed or created with a plug-in, such as Word Formula Editor or MathType. Mathematical expressions must not be displayed as images
- Important definitions or concepts can also be set off as display math.
- Number your equations sequentially.
- Insert a blank line before and after each equation.
- Whether equation numbers are on the right or left is the choice of the author(s). However, make sure to be consistent in this.
- When proofing your document, pay particular attention to the rendering of the mathematics, especially symbols and notation drawn from other-than-standard fonts.

### Units

Use SI units. For more information, please visit <https://www.bipm.org/en/home>.

## Appendices

Use appendices for information that supports your findings but is not essential for the understanding of your paper (e.g., lengthy mathematical proofs, questionnaires, graphics, correspondence with other researchers). Cite appendices within the main text. Tables and figures in the appendix should be numbered consecutively as follows: Figure A.1, Table A.1, Figure A.2, Table A.2, etc. The appendix is placed at the end of the main text before the reference list.

## Supplementary Material

Authors are encouraged to submit supplementary materials in addition to the manuscript files. The data/information will be available online on the journal's website.

Supplements also offer an opportunity to store “cooking” recipes or necessary notes to enable the reproduction of the described method. Supplementary material may contain questionnaires for discussed surveys, protocols, code samples, datasets, extensive tables, additional figures, multimedia files (audio, video, animations), etc. If the manuscript is accepted, supplementary material will be referenced in the print version, but will be published online only. Material that has been published previously should not be included as supplementary files.

Please provide supplementary material data as separate file(s) of no more than 10 MB per file during submission. Note that the material should be publication-ready (not in track-changes mode), as it will not be typeset, but published exactly as supplied. Within the text, the supplementary material must be cited consecutively and be referred to as supplementary material data (e.g., see Supplementary Material, Fig. 1, or Figure S1, Table S1, etc.)

## Author Statements

Manuscripts must follow certain ethical guidelines to be considered for publication. These can generally be found in the [Publication Ethics and Malpractice Statement](#). Accordingly, before submitting your manuscript, please make sure that you and your co-authors agree to the applicable requirements. For example, this may involve declaring and ruling out conflicts of interest or proving compliance with legal requirements related to human and animal testing.

Furthermore, our [Code of Conduct for Publication Procedures and Ethics](#) defines the responsibility of De Gruyter as a publisher and the Editors we work with, to ensure the legitimacy and quality of our published research. Our principles are based on the guidelines of the [Committee on Publication Ethics \(COPE\)](#). Please ensure the following statements relating to publication ethics are included in your submission. These should appear at the end of your article, before your references. During the submission of an article, authors will also be asked to provide author statements in a separate document. Please refer to the [author statements template](#).

- Acknowledgments (if applicable)
- Research ethics (if applicable)
- Author contributions (mandatory)
- Competing interests (mandatory)
- Research funding (mandatory)
- Data availability (mandatory)

## Language editing and AI usage

Please ensure that your manuscript adheres to the following guidelines. For specific requirements for different article types, please refer to the article categories guidelines above.

### Language and language editing

All manuscripts must be written in clear and concise English. Please use British or American English consistently. De Gruyter provides a light copyedit of accepted manuscripts, but authors remain responsible for their own copyediting. If you have reasons to doubt your proficiency concerning spelling or grammar (e.g., because English is not your native language), you may wish to employ – at your own expense – the services of a professional language editor.

### Artificial Intelligence and Language Editing

In line with COPE's position on the use of artificial intelligence (AI) in published research, *MiM* and De Gruyter do not allow any AI tool to be listed as an author of a paper. However, authors who use AI tools to help write their paper, such as for language editing, must disclose this transparently in the Acknowledgements or Materials and Methods section, whichever is most relevant. Authors should state clearly which AI tool was used and for which specific purpose. For more information, please see [COPE's full AI statement](#).

### Submission of manuscripts

Please refer to the [submission checklist](#) for a full set of necessary documents.

Please submit manuscripts exclusively online at: <http://mc.manuscriptcentral.com/mim>  
You will be guided through the whole submission process.

During the submission of an article, authors will be asked to provide their entire manuscript in the PDF format. Additionally, as the "Source Code of Main Document" users of Word are asked to upload a DOC/DOCX file (containing all tables and figures), whereas LaTeX users must upload ALL source codes in a ZIP archive (incl. TEX, CLS, STY).

If you require any support with submitting your manuscript to ScholarOne, please contact the Editorial Office at [editor@methodsmicroscopy.org](mailto:editor@methodsmicroscopy.org).

### Author roles in ScholarOne Manuscripts

Submitting author: Submitting person.

Contact author: Author who receives all correspondence in the submission system.

Corresponding author: Author identified as Corresponding Author at the time of submission and contact person for all post-acceptance concerns, i.e., proof correction, open access procedures and post-publication research-related issues.

We strongly recommend the authors to register with institutional e-mail addresses, and refrain from using private e-mail addresses.

### Cover letter

A cover letter must be submitted for each manuscript upon first submission. It should contain a brief statement by the authors as to the element of novelty upon which they base their request for publication in *MiM*. Please address the cover letter to the Editor-in-Chief. Revised manuscripts must be accompanied by a point-by-point reply to the reviewers' criticisms. Major changes in the revised manuscript must be highlighted, preferably in tracked changes mode. A second, clean version should always be submitted for major changes.

### ORCID

The ORCID (Open Researcher and Contributor ID) is a non-profit, publisher-independent system that is used to uniquely identify academics and their publications. Click [here](#) for detailed information about ORCID. Submitting authors can login with username and password. If the journal uses ScholarOne as submission tool, authors can also login with their ORCID number. Providing an ORCID number for each author is strongly recommended. ORCID numbers should be listed on the title page.

### Submission declaration and verification

For information on plagiarism, please refer to [COPE – Committee of Publication Ethics](#). Submission of a manuscript to a journal implies that the work described has not been published previously, except in the form of an abstract, academic thesis, lecture, or preprint; that it is not under consideration for publication elsewhere (multiple, redundant, concurrent publication); that publication of the work is approved by all authors and tacitly or explicitly by the responsible authorities where the work was carried out; and that, if accepted for publication, it will not be published elsewhere, no matter in which language, without the written consent of the Publisher. Exceptions are listed under Preprint policy.

To exclude potential overlap with prior publication(s), your manuscript may be checked by the plagiarism checker Crossref Similarity Check ([iThenticate](#)). Previously published material must be referenced appropriately in the manuscript, regardless of whether the material was previously published in a subscription based, hybrid or open access journal, or in another language.

### **Scientific misconduct**

Only articles that have not been or will not be published elsewhere will be published in the journal, excluding articles that fall under De Gruyter's [Repository Policy](#). Multiple submissions/publications or redundant publications will be rejected. If identified after publication, the journal reserves the right to publish a retraction note. In any case, editors will follow COPE's Code of Conduct and implement its advice.

### **Research integrity**

The authors are responsible for all aspects of the study and will ensure that any questions regarding the accuracy and integrity of any part of the work are adequately investigated and resolved.

With submitting your manuscript to *MiM* the authors declare that they are the sole and intellectual authors of the manuscript. We do not accept submissions that name Artificial Intelligence (AI) and/or Machine Learning Tools as credited author(s) on a manuscript because such tools cannot take responsibility for the submitted work and therefore cannot be considered as eligible authors. Where such tools or technologies are used as part of the design or methodology of a research study, their use should be clearly described in the Acknowledgments section. In case of doubt, the Editorial Board reserves the right to ask the authors to submit the raw experimental data.

## **Peer review, turnaround times and preprint policies**

### **Peer review information**

*MiM* operates a single-blind peer review model.

The journal operates a two-phase refereeing system. All manuscripts are initially reviewed by the Managing Editor to assess the level of scientific writing, scientific innovation and integrity.

The manuscript is subject to a similarity check before it is sent for peer review. This check uncovers any text that has been taken over from other documents. Text that has been copied must be written in quotation marks. For longer adaptations, a copyright clearance can be necessary.

Manuscripts that proceed to the peer review stage are reviewed by at least two independent reviewers selected by the Managing Editor.

Authors are encouraged to suggest the names of relevant reviewers. Reviewers indicated by the authors must be from different institutions to the authors and should not have collaborated on the same research project within the past three years. Authors may also provide names of reviewers they wish to exclude from reviewing their manuscript.

### **Revision**

Revised manuscripts should be submitted via Scholar One. In the revision the author should respond to the comments made by the reviewer(s). Please add

1. a point-by-point reply to the reviewers' comments,
2. and/or a rebuttal against each point that is being raised.

The revision should be uploaded in Scholar One under File Upload - File Designation - Author's Response to Reviewer/Editor Critique.

Reply to the reviewer(s)' comments is mandatory; all revised manuscripts without reply will be sent back to the author.

Within the revised file the author should highlight the changes within the manuscript by using underlined or colored text. Once the revised manuscript is prepared, the author can upload and submit it through the Scholar One Author Center. The original files are available after uploading the revised manuscript. For more information, please read the decision letter carefully.

### Rejection of manuscripts

Manuscripts that have been rejected for publication will be reconsidered only at the discretion of the Editor(s). Authors wishing to request reconsideration of a previously rejected manuscript must do so in written form and submit a rebuttal by email to the Editor at [editor@methodsmicroscopy.org](mailto:editor@methodsmicroscopy.org). Authors should provide detailed reasons as to why they believe the manuscript should be reconsidered. If the rebuttal is accepted, the author will be asked to resubmit the manuscript. The resubmitted manuscript will be given a new manuscript ID and submission date before undergoing peer review.

### Preprint policy

De Gruyter does not consider the following purposes of a paper as pre-publication: publication in the form of a congress abstract, publication as an academic thesis, publication as an electronic preprint on recognized servers such as arXiv, RePEc, bioRxiv, ResearchSquare, etc.

### Post-acceptance

The following section provides information on the production process once an article has been accepted for publication in the journal.

#### Galley proofs/Online proofreading:

The corresponding author of an article, as well as the co-authors (in cc) receive the galley proofs in electronic form to check them for editing and typesetting accuracy. They receive an e-mail notification ("Check your proof") with a link to the online proofreading system (Proof Central) through which they can access their galley proofs. The co-authors have to communicate their corrections through the corresponding author. The interface of the proofreading system is similar to MS Word: authors can edit the text by entering their corrections directly, adding comments, and answering questions from the copy editor. If preferred, authors can also annotate and upload edits to the PDF version.

Substantial changes to an article accepted for publication will only be considered with the permission of the Editor or after additional peer review. The responsibility for proofreading lies solely with the authors.

According to De Gruyter policy, once an article has been accepted, no changes to the author list and article title are allowed (except typos). The De Gruyter production team is instructed to enforce this policy during the production/proof correction process.

#### Issue based publication

Articles are first published online as DOI citable articles and are later assigned to an online issue with final page numbers.

#### Offprints

Electronic files of typeset articles in Adobe Acrobat PDF format are provided free of charge. The corresponding author will receive an e-mail notification when the article has been published online along with instructions on how to access the article.

### Rights, licenses and charges

#### Open access license

All De Gruyter open access publications are published under a [Creative Commons license](#). The Creative Commons licenses specify the extent to which the work can be re-used by the scholarly community and the general public. For us as publisher, this means that we receive non-exclusive exploitation rights.

Permitted third party reuse of gold open access articles is determined by the user license. The majority of all De Gruyter journals are published under the Creative Commons license CC-BY 4.0 (<http://creativecommons.org/licenses/by/4.0>), but there are exceptions. The Creative Commons license is specified in the 'License to Publish', which you can download from the journal's website.

### License to Publish

During submission of an article to an Open Access journal, authors will be asked to complete a 'License to Publish' ([License to Publish](#)).

### Article Processing Charges (APCs)

To sustain the production of our fully refereed open access journal, each article accepted for publication in *MiM* is subject to an article processing charge of € 2,000. This fee is used to cover the costs of the peer review process, professional typesetting and copyediting, as well as online hosting, long-term preservation and extensive promotion to potential readers. Information regarding payment of these charges will be provided following acceptance for publication. Enquiries concerning article processing charges should be addressed to the Editor ([editor@methodsmicroscopy.org](mailto:editor@methodsmicroscopy.org)).

### Waiver Policy

If the submitting author is affiliated with an organisation that has an open access agreement with De Gruyter, APCs may be covered or discounted.

In addition, *MiM* and De Gruyter are committed to supporting researchers in emerging nations to share their research with a global audience. APCs may be waived for authors who work for institutions in developing countries (countries classified by the World Bank as low-income and lower-middle-income economies).

Moreover, all authors can apply for a discount or waiver during the submission process. Authors are asked to contact the Managing Editor before, or straight after, submitting their article.

## Support and questions

Thank you for your interest in submitting your article to *MiM*!

If you have any questions or need any further help, please use the contact details below.

Managing Editors

Dr Andreas Thoss and Dr Martin Friedrich

Email: [editor@methodsmicroscopy.org](mailto:editor@methodsmicroscopy.org).

Journal Coordinator

Katharina Kaupen

Email: [katharina.kaupen@degruyter.com](mailto:katharina.kaupen@degruyter.com)
